# Supplementary material for: The Role of Outer Membrane Protein(s) Harboring SLH/OprB-Domains in Extracellular Vesicles’ Production in Synechocystis sp. PCC 6803
Source: MDPI journal article supplement (doi:10.3390/plants10122757), 2021-12-14
Supplement: s1 [file s1]

## Supplementary Material

**Table S1 - Transcript levels analysis of the *Synechocystis* sp. PCC 6803 transcriptional units (TU) harboring genes encoding SLH/OprB-domains outer membrane proteins under 10 different environmental conditions, as determined by [18].**

| TU ID  | TU start | TU end  | Strand | 5'UTR | genes | 15 °C | 42 °C | -CO <sub>2</sub> | Dark | -Fe   | HL      | -N    | -P    | Exp. p. | Stat. p. | Max reads | Average  | Max/Avg | Sense tags                                                                               |
|--------|----------|---------|--------|-------|-------|-------|-------|------------------|------|-------|---------|-------|-------|---------|----------|-----------|----------|---------|------------------------------------------------------------------------------------------|
| TU971  | 958084   | 960116  | +      | 53    | 1     | 40362 | 45295 | 38272            | 9363 | 45113 | 95667   | 82402 | 66762 | 49195   | 29046    | 95667     | 50147,7  | 1,91    | <b>slr1841</b>                                                                           |
| TU599  | 610937   | 614020  | +      | 120   | 3     | 21331 | 15443 | 7420             | 243  | 42214 | 53026   | 11858 | 43046 | 22829   | 4413     | 53026     | 22182,3  | 2,39    | <b>slr1908</b> , <i>slr1909</i> ,<br><i>slr1910</i>                                      |
| TU1141 | 1116114  | 1111170 | -      | 93    | 4     | 1678  | 0     | 58               | 0    | 214   | 259     | 2823  | 0     | 13761   | 180      | 13761     | 1897,3   | 7,25    | <i>slr1270</i> , <b>slr1271</b> ,<br><i>ssl2507</i> , <i>slr1272</i>                     |
|        |          |         |        |       |       |       |       |                  |      |       |         |       |       |         |          |           |          |         | <b>slr0772</b>                                                                           |
| TU3332 | 3168888  | 3176441 | +      | 166   | 5     | 30343 | 1201  | 345174           | 2673 | 5711  | 1005917 | 5985  | 26025 | 207607  | 180      | 1005917   | 163081,6 | 6,17    | <i>slr0040</i> , <i>slr0041</i> ,<br><b>slr0042</b> , <i>slr0043</i> ,<br><i>slr0044</i> |
| TU3630 | 3456162  | 3454008 | -      | 106   | 1     | 0     | 33    | 19               | 0    | 1382  | 199     | 75    | 39    | 210     | 45       | 1382      | 200,2    | 6,9     | <b>slr1550</b>                                                                           |

In bold are highlighted the genes encoding SLH/OprB-domains outer membrane proteins studied in this work.

**Table S2. Oligonucleotides used in this work.**

| Oligo              | Application                              | Sequence (5' to 3')                    | Product size (bp) | Restriction Enzyme | T <sub>a</sub> (°C) |
|--------------------|------------------------------------------|----------------------------------------|-------------------|--------------------|---------------------|
| <i>slr1841</i> 5'F | <i>slr1841</i> 5' recombination platform | Aaa <u>ctcgag</u> agtcctgttagtgagccct  | 651               | XhoI               | 63                  |
| <i>slr1841</i> 5'R |                                          | Aaactgcagcgagacgagtgaccaacagg          |                   | PstI               |                     |
| <i>slr1841</i> 3'F | <i>slr1841</i> 3' recombination platform | Aaactgcagtggttactggctagcacg            | 663               | PstI               | 63                  |
| <i>slr1841</i> 3'R |                                          | Aaaggatccgcagagggttagcagtggtt          |                   | BamHI              |                     |
| <i>slr1908</i> 5'F | <i>slr1908</i> 5' recombination platform | Aaa <u>ctcgag</u> agtcacaggtgaattggcc  | 580               | XhoI               | 63                  |
| <i>slr1908</i> 5'R |                                          | Aaactgcaggcgccgaagtgtcaatgtt           |                   | PstI               |                     |
| <i>slr1908</i> 3'F | <i>slr1908</i> 3' recombination platform | Aaactgcagctggattggcggtactggtt          | 668               | PstI               | 63                  |
| <i>slr1908</i> 3'R |                                          | Aaaggatccaggggcatcaaacaccactc          |                   | BamHI              |                     |
| <i>slr0042</i> 5'F | <i>slr0042</i> 5' recombination platform | Aaa <u>ctcgag</u> gtgacatcggttcggagtt  | 647               | XhoI               | 63                  |
| <i>slr0042</i> 5'R |                                          | Aaactgcagggttgagatttggggatt            |                   | PstI               |                     |
| <i>slr0042</i> 3'F | <i>slr0042</i> 3' recombination platform | Aaactgcaggcctaacgatgtgtcgatt           | 629               | BamHI              | 63                  |
| <i>slr0042</i> 3'R |                                          | Aaaggatcctagagtcgcctccggatta           |                   | PstI               |                     |
| <i>slI1550</i> 5'F | <i>slI1550</i> 5' recombination platform | Aaa <u>ctcgag</u> gggacagatcactccgtgt  | 566               | XhoI               | 63                  |
| <i>slI1550</i> 5'R |                                          | Aaactgcagacactggctggaaagtaccg          |                   | PstI               |                     |
| <i>slI1550</i> 3'F | <i>slI1550</i> 3' recombination platform | Aaactgcagaccogtagcccgatctattt          | 581               | PstI               | 63                  |
| <i>slI1550</i> 3'R |                                          | Aaaggatcctcaatgtcagtggtgcaat           |                   | BamHI              |                     |
| <i>slI0772</i> 5'F | <i>slI0772</i> 5' recombination platform | Aaa <u>ctcgag</u> ggcaatggcgtaatacaagt | 689               | XhoI               | 63                  |
| <i>slI0772</i> 5'R |                                          | Aaactgcagacagtacccaagcgagagt           |                   | PstI               |                     |
| <i>slI0772</i> 3'F | <i>slI0772</i> 3' recombination platform | Aaactgcagagctggcttaattggcaga           | 636               | PstI               | 63                  |
| <i>slI0772</i> 3'R |                                          | Aaaggatccttaagcacgacccaaaaacc          |                   | BamHI              |                     |
| <i>slI1271</i> 5'F | <i>slI1271</i> 5' recombination platform | Aaa <u>ctcgag</u> aacgacaatgccaaaacctc | 648               | XhoI               | 63                  |
| <i>slI1271</i> 5'R |                                          | Aaactgcaggcgcgcaagttaaaatcag           |                   | PstI               |                     |
| <i>slI1271</i> 3'F | <i>slI1271</i> 3' recombination platform | Aaactgcagatcgccccatttattacc            | 574               | PstI               | 63                  |
| <i>slI1271</i> 3'R |                                          | Aaaggatcccgggtgtagcgggagtaata          |                   | BamHI              |                     |
| pUC 4K F           | Kanamycin resistance cassette            | aaactgcagtgaggtctgcctcgtaagaa          | 1226              | PstI               | 64                  |
| pUC 4K R           |                                          | aaactgcagaaagccacgttgtgtctcaaa         |                   | PstI               |                     |

The pair of oligonucleotide used for the amplification of the kanamycin resistance cassette was taken from [29].

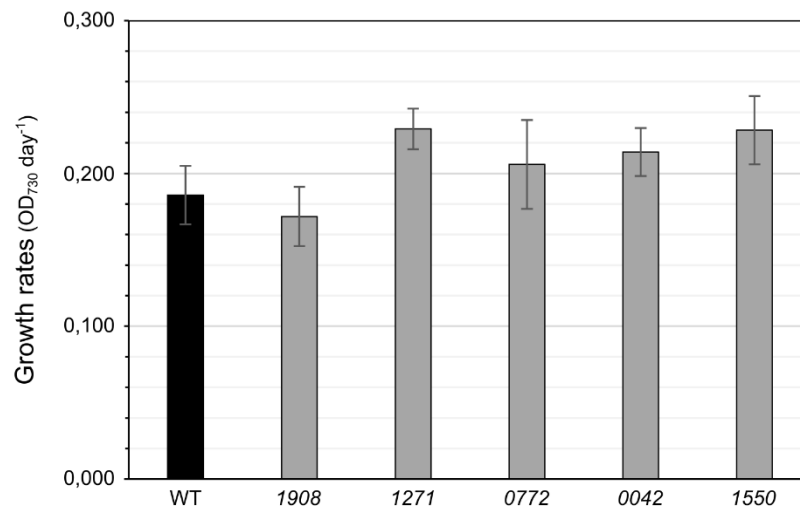

**Figure S1. *Synechocystis* sp. PCC 6803 disruption mutants' growth rates determined in cultures grown under standard conditions.** *Synechocystis* cultures of the wild-type (WT) and mutant strains *slr1908* (1908), *slr1271* (1271), *slr0772* (0772), *slr0042* (0042) and *slr1550* (1550) were grown in BG11 liquid medium, in 96-well clear bottomed microplates at 30 °C with a 16 h light (50  $\mu\text{mol photons m}^{-2} \text{s}^{-1}$ ) / 8 h dark cycle regime, with agitation, for 4 days. Every day, cell cultures were suspended and their optical density (OD<sub>730</sub>) measured on a microplate reader. Growth rates were determined between the first and fourth day of cultivation. Error bars represent the standard deviation of three independent biological replicates.
